# Supplementary material for: Trends and Characteristics of Brown Rice Consumption among Adults in Japan: An Analysis of the National Health and Nutrition Surveys, 2012–2019
Source: MDPI journal article supplement (doi:10.3390/nu16101473), 2024-05-13
Supplement: s1 [file s1]

## **Supplementary material**

Trends and characteristics of brown rice consumption among adults in Japan: an analysis of the National Health and Nutrition Surveys, 2012–2019

Nayu Ikeda, Miwa Yamaguchi, Nobuo Nishi

Correspondence: Nayu Ikeda, PhD

[ikedan@nibiohn.go.jp](mailto:ikedan@nibiohn.go.jp)

Section of Population Health Metrics

International Center for Nutrition and Information

National Institute of Health and Nutrition

National Institutes of Biomedical Innovation, Health and Nutrition

Settsu, Osaka, Japan

**Table S1. Number of participants aged  $\geq 20$  years in the National Health and Nutrition Survey and those included in the study with records merged from the Comprehensive Survey of Living Conditions**

| Sex, survey year | n      | Included in the study, n (%) | Merged with CSLC, n (%) |
|------------------|--------|------------------------------|-------------------------|
| Sexes combined   |        |                              |                         |
| 2012             | 30,639 | 26,726 (87.2)                | NA                      |
| 2013             | 7,248  | 6,481 (89.4)                 | 6,120 (84.4)            |
| 2014             | 7,738  | 6,727 (86.9)                 | 6,408 (82.8)            |
| 2015             | 7,194  | 6,172 (85.8)                 | 5,852 (81.3)            |
| 2016             | 26,225 | 21,851 (83.3)                | NA                      |
| 2017             | 6,775  | 5,750 (84.9)                 | 5,292 (78.1)            |
| 2018             | 6,642  | 5,743 (86.5)                 | 5,269 (79.3)            |
| 2019             | 5,817  | 4,927 (84.7)                 | 4,629 (79.6)            |
| Total            | 98,278 | 84,377 (85.9)                | 33,570 (81.1)           |
| Females          |        |                              |                         |
| 2012             | 16,412 | 14,461 (88.1)                | NA                      |
| 2013             | 3,867  | 3,483 (90.1)                 | 3,276 (84.7)            |
| 2014             | 4,121  | 3,615 (87.7)                 | 3,429 (83.2)            |
| 2015             | 3,861  | 3,332 (86.3)                 | 3,148 (81.5)            |
| 2016             | 14,093 | 11,864 (84.2)                | NA                      |
| 2017             | 3,543  | 3,054 (86.2)                 | 2,795 (78.9)            |
| 2018             | 3,547  | 3,080 (86.8)                 | 2,820 (79.5)            |
| 2019             | 3,092  | 2,630 (85.1)                 | 2,471 (79.9)            |
| Total            | 52,536 | 45,519 (86.6)                | 17,939 (81.4)           |
| Males            |        |                              |                         |
| 2012             | 14,227 | 12,265 (86.2)                | NA                      |
| 2013             | 3,381  | 2,998 (88.7)                 | 2,844 (84.1)            |
| 2014             | 3,617  | 3,112 (86.0)                 | 2,979 (82.4)            |
| 2015             | 3,333  | 2,840 (85.2)                 | 2,704 (81.1)            |
| 2016             | 12,132 | 9,987 (82.3)                 | NA                      |
| 2017             | 3,232  | 2,696 (83.4)                 | 2,497 (77.3)            |
| 2018             | 3,095  | 2,663 (86.0)                 | 2,449 (79.1)            |
| 2019             | 2,725  | 2,297 (84.3)                 | 2,158 (79.2)            |
| Total            | 45,742 | 38,858 (85.0)                | 15,631 (80.6)           |

CSLC, Comprehensive Survey of Living Conditions; NA, not applicable.

**Table S2. Food items and weight change factors. This table presents the food items included in the study with their corresponding weight change factors, obtained from the Standard Tables of Food Composition in Japan, 2015 edition [1].**

| Food item                                                                             | Weight change factor |
|---------------------------------------------------------------------------------------|----------------------|
| <b>Brown rice</b>                                                                     |                      |
| Rice, paddy rice, brown rice, raw                                                     | Not applicable       |
| Rice, short grain, paddy rice, brown, “meshi” (cooked rice)                           | 210                  |
| Rice, short grain, paddy rice, brown, “zengayu” (gruel)                               | 500                  |
| Rice, short grain, paddy rice, brown, “gobugayu” (diluted gruel)                      | 1,000                |
| Rice, short grain, paddy rice, brown, “omoyu” (thin gruel)                            | 1,700                |
| Rice, short grain, paddy rice, germinated brown rice, raw                             | Not applicable       |
| Rice, short grain, paddy rice, germinated brown rice, “meshi” (cooked rice)           | 210                  |
| <b>White rice</b>                                                                     |                      |
| Rice, paddy rice, non-glutinous, well-milled, raw                                     | Not applicable       |
| Rice, short grain, paddy rice, non-glutinous rice, well-milled, “meshi” (cooked rice) | 210                  |
| Rice, short grain, paddy rice, well-milled, “zengayu” (gruel)                         | 500                  |
| Rice, short grain, paddy rice, well-milled, “gobugayu” (diluted gruel)                | 1,000                |
| Rice, short grain, paddy rice, well-milled, “omoyu” (thin gruel)                      | 1,700                |
| Rice, non-glutinous rice products, quick-cooking rice, regular, raw                   | 210                  |
| Rice, non-glutinous rice products, “Onigiri” (rice ball)*                             | 210                  |
| Rice, non-glutinous rice products, “Yaki-onigiri” (baked rice ball)**                 | 210                  |

\* Without laver and filling; containing 0.5 g of salt per 100 g.

\*\* Containing 6.5 g of common soy sauce per 100 g.

## References

1. Ministry of Education, Culture, Sports, Science, and Technology. Standard tables of food composition in Japan - 2015 - (Seventh revised edition). 2015. Available online: [https://www.mext.go.jp/en/policy/science\\_technology/policy/title01/detail01/1374030.htm](https://www.mext.go.jp/en/policy/science_technology/policy/title01/detail01/1374030.htm) (accessed on March 12, 2024).
